# Supplementary material
Source: Springer Nature journal article supplement (https://www.springermedizin.de/resource/supplementary/12943_2012_1073_MOESM1_ESM.pdf/9552174)

**A**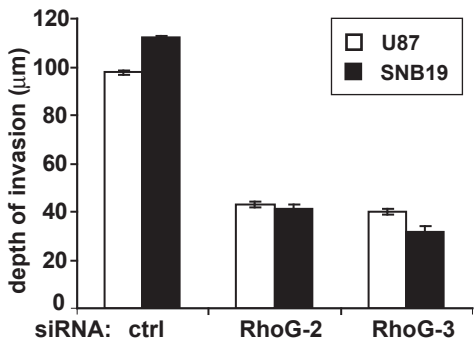**B**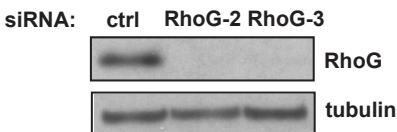**C**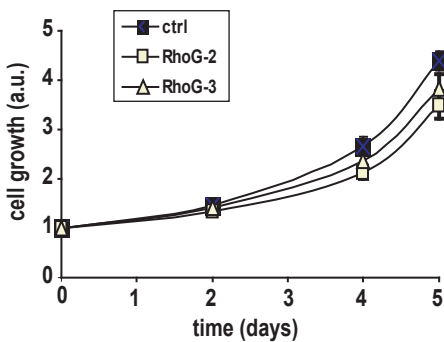**D**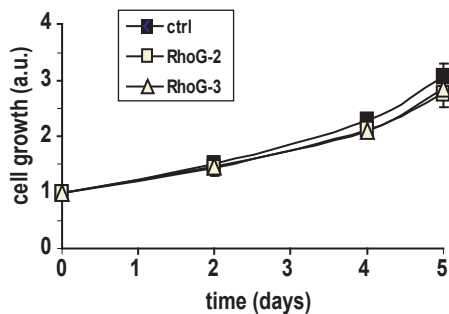

Supplement: MOESM1 [file 9552174]
